# Supplementary material
Source: MDPI journal article supplement (https://www.mdpi.com/2073-4395/11/9/1795)
Supplement: s1 [file s1 › agronomy-1341321-supplementary.pdf]

## Supplementary material

# Biochar and *Bacillus* sp. MN54 Assisted Phytoremediation of Diesel and Plant Growth Promotion of Maize in Hydrocarbons Contaminated Soil

Muhammad Hayder Ali <sup>1,4</sup>, Muhammad Imran Khan <sup>1,\*</sup>, Safdar Bashir <sup>2</sup>, Muhammad Azam <sup>3</sup>, Muhammad Naveed <sup>1</sup>, Rashad Qadri <sup>3</sup>, Saqib Bashir <sup>2</sup>, Fizza Mehmood <sup>1</sup>, Muhammad Aqeel Shoukat <sup>1</sup>, Yunzhou Li <sup>4,\*</sup>, Jawaher Alkahtani <sup>5</sup>, Mohamed S. Elshikh <sup>5</sup> and Yheni Dwiningsih <sup>6</sup>

<sup>1</sup> Institute of Soil and Environmental Sciences, University of Agriculture, Faisalabad 38040, Pakistan; hayderali3033@gmail.com (M.H.A.); mnaveeduaf@gmail.com (M.N.); fizzi.meh@gmail.com (F.M.); maqeeltor@gmail.com (M.A.S.)

<sup>2</sup> Department of Soil and Environmental Sciences, Ghazi University, Dera Ghazi Khan 32200, Pakistan; sabashir@gudgk.edu.pk (S.B.); sbashir@gudgk.edu.pk (S.B.)

<sup>3</sup> Institute of Horticultural Sciences, University of Agriculture, Faisalabad 38040, Pakistan; azam32jb@yahoo.com (M.A.); rashad.qadri@uaf.edu.pk (R.Q.)

<sup>4</sup> Department of Plant Pathology, College of Agriculture, Guizhou University, Guiyang 550025, China

<sup>5</sup> Department of Botany and Microbiology, College of Science, King Saud University, Riyadh 11451, Saudi Arabia; jsalkahatani@gmail.com (J.A.); mohamadsolyman@gmail.com (M.S.E.)

<sup>6</sup> Department of Crop, Soil and Environmental Sciences, Fayetteville, AR, 72701 USA; Sh1133484@gmail.com

\* Correspondence: khanimran1173@yahoo.com (M.I.K.); liyunzhou2007@126.com (Y.L.)

**Table S1.** Detail of treatments used in this study.

| Treatments | Detail                                                                         |
|------------|--------------------------------------------------------------------------------|
| Control    | Uncontaminated soil with plants                                                |
| PHs        | Contaminated soil without plants, <i>Bacillus</i> sp. MN54 and biochar         |
| PHs+P      | Contaminated soil with plants                                                  |
| B+PHs      | Contaminated soil with biochar but without plants                              |
| B+PHs+P    | Contaminated soil with biochar and plants                                      |
| M+PHs      | Contaminated soil with <i>Bacillus</i> sp. MN54 but without plants and biochar |
| M+PHs+P    | Contaminated soil with plants and <i>Bacillus</i> sp. MN54                     |
| B+M+PHs    | Contaminated soil with <i>Bacillus</i> sp. MN54 and biochar but without plants |
| B+M+PHs+P  | Contaminated soil with plants, <i>Bacillus</i> sp. MN54 and biochar            |

**Table S2.** Physicochemical properties of the soil used in the study.

| Parameters                         | Soil                                               | Biochar     |
|------------------------------------|----------------------------------------------------|-------------|
| Texture                            | Sandy loam (sand 52.8%, silt 25.4% and clay 21.8%) | -           |
| pH                                 | 7.75 ± 0.14                                        | 8.1 ± 1.1   |
| EC (dS m <sup>-1</sup> )           | 1.78 ± 0.23                                        | 2.3 ± 0.5   |
| CEC (mmolc L <sup>-1</sup> )       | 13.8 ± 0.98                                        | 48.5 ± 3.7  |
| Organic matter (%)                 | 0.57 ± 0.26                                        | -           |
| Total C (%)                        | -                                                  | 52.1 ± 3.4  |
| Total N (mg kg <sup>-1</sup> )     | 1.37 ± 0.44                                        | 1008 ± 0.24 |
| Available P (mg kg <sup>-1</sup> ) | 5.65 ± 0.92                                        | 1814 ± 0.21 |
| Available K (mg kg <sup>-1</sup> ) | 129 ± 7.34                                         | 7360 ± 0.72 |

EC, electrical conductivity; CEC, cation exchange capacity

Values represent means (n=3) ± standard deviation

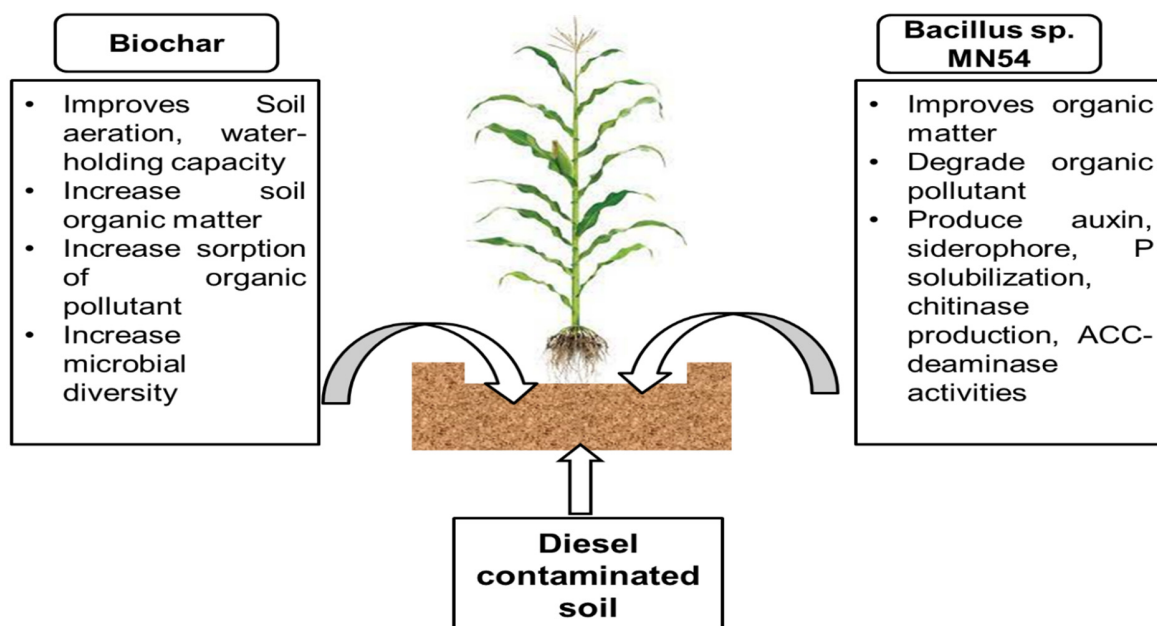

**Figure S1.** Effect of biochar and bacillus sp. MN54 physical parameters of maize plants grown in hydrocarbons contaminated soil.
